# Supplementary material
Source: publisher site journal article supplement (https://www.dovepress.com/article/357855)
Supplement: Supplementary file 1 [file get_supplementary_file.php]

**Supplementary Table 1.** Institutional Review Boards Providing Study Approval

|                                                                                                       |
|-------------------------------------------------------------------------------------------------------|
| Peking University Third Hospital Ethics Committee                                                     |
| Peking Union Medical College Hospital Ethics Committee                                                |
| Tongji Medical College Huazhong University of Science and Technology<br>Ethics Committee              |
| Shanghai Sixth People's Hospital Ethics Committee                                                     |
| Shanghai Ninth People's Hospital, Shanghai JiaoTong University School of Medicine<br>Ethics Committee |
